# Supplementary material
Source: Springer Nature journal article supplement (https://www.springermedizin.de/resource/supplementary/12901_2012_90_MOESM3_ESM.docx/9515192)
Supplement: MOESM3 [file 9515192]

| **Patient** | **Intraop finding** | **Material** | **Improvement of hearing** |
| --- | --- | --- | --- |
| 1 | fistula | fat | < 20 dB |
| 2 | no fistula | fat | > 20 dB |
| 3 | doubtful fistula | fat | > 20 dB |
| 4 | doubtful fistula | fat | no change |
| 5 | no fistula | fat | > 20 dB |
| 6 | fistula | fat | < 20 dB |
| 7 | doubtful fistula | fat | > 20 dB |
| 8 | fistula | fat | < 20 dB |
| 9 | fistula | fat | < 20 dB |
| 10 | doubtful fistula | fat | > 20 dB |
| 11 | doubtful fistula | fat | > 20 dB |
| 12 | no fistula | soft tissue | > 20 dB |
| 13 | no fistula | fat | > 20 dB |
| 14 | fistula | fat | < 20 dB |
| 15 | no fistula | fat | < 20 dB |
| 16 | doubtful fistula | fat | > 20 dB |
| 17 | no fistula | soft tissue and fibrin glue | > 20 dB |
| 18 | no fistula | fat | > 20 dB |
| 19 | doubtful fistula | fat | > 20 dB |
| 20 | doubtful fistula | fat | < 20 dB |
| 21 | no fistula | fat | < 20 dB |
| 22 | doubtful fistula | fat | no change |
| 23 | no fistula | fat | > 20 dB |
| 24 | no fistula | fat | > 20 dB |
| 25 | no fistula | soft tissue | < 20 dB |
| 26 | no fistula | fat | < 20 dB |
| 27 | doubtful fistula | fat | < 20 dB |
| 28 | doubtful fistula | fat | no change |
| 29 | doubtful fistula | fat | > 20 dB |
| 30 | doubtful fistula | soft tissue | > 20 dB |
| 31 | no fistula | fat | > 20 dB |
| 32 | no fistula | soft tissue | > 20 dB |
| 33 | fistula | fat | > 20 dB |
| 34 | no fistula | fat | < 20 dB |
| 35 | no fistula | fat | no change |
| 36 | no fistula | fat | < 20 dB |
| 37 | fistula | fat | no change |
| 38 | no fistula | fat | < 20 dB |
| 39 | no fistula | fat | < 20 dB |
| 40 | no fistula | fat and soft tissue | < 20 dB |
| 41 | no fistula | fat | > 20 dB |
| 42 | no fistula | fat | < 20 dB |
| 43 | no fistula | fat | < 20 dB |
| 44 | no fistula | fat | no change |
| 45 | no fistula | fat | no change |
| 46 | no fistula | fat | > 20 dB |
| 47 | no fistula | fat | < 20 dB |
| 48 | no fistula | fat | > 20 dB |
| 49 | no fistula | fat and soft tissue | < 20 dB |
| 50 | no fistula | fat | no change |
| 51 | no fistula | soft tissue | > 20 dB |
| 52 | no fistula | fat | < 20 dB |
| 53 | no fistula | fat | < 20 dB |
| 54 | doubtful fistula | soft tissue | > 20 dB |
| 55 | no fistula | fat | < 20 dB |
| 56 | fistula | fat and fibrin glue | > 20 dB |
| 57 | fistula | fat | > 20 dB |
| 58 | no fistula | fat | > 20 dB |
| 59 | fistula | fat | > 20 dB |
| 60 | no fistula | fat | > 20 dB |
| 61 | no fistula | fat | > 20 dB |
| 62 | no fistula | soft tissue | no change |
| 63 | doubtful fistula | fat | > 20 dB |
| 64 | fistula | fat | > 20 dB |
| 65 | no fistula | soft tissue | > 20 dB |
| 66 | no fistula | fat | < 20 dB |
| 67 | fistula | fat and fibrin glue | > 20 dB |
| 68 | fistula | fat | > 20 dB |
| 69 | no fistula | fat | no change |

Table 2: Intraoperative findings according to the categories: fistula, no fistula and doubtful fistula. Material used to cover the round window niche and postoperative hearing improvement (n=69).
